# Supplementary material for: Empathy and Physical Fitness: A Cross-Sectional Study Among Chinese College Freshmen
Source: Research Square preprint supplement (doi:10.21203/rs.3.rs-6905539/v1), 2025-07-29
Supplement: Supplementary file 1 [file 751cabeaf3e5c78d395238ec.docx]

**Appendix 1: Comparison of physical fitness among different groups of college freshmen**

| **Constituencies** | **Family members** | |  | **Hometown types** | | | |  | **Major types** | |
| --- | --- | --- | --- | --- | --- | --- | --- | --- | --- | --- |
| One | More than one |  | City | | | Country |  | Social Sciences | Natural Sciences |
| **Female's physical fitness (*N* = 2079)** | | | | | | | | | | |
| BMI (kg/m2) | 20.68 ± 3.04 | 20.74 ± 2.89 |  | 20.69 ± 3.07 | | | 20.74 ± 2.83 |  | 20.69 ± 2.94 | 20.743 ± .030 |
| t (p)-value | -0.50 (0.62) | |  | -0.35 (0.73) | | | |  | -0.39 (0.7) | |
| Lung capacity (ml) | 3004.91 ± 576.52 | 2848 ± 527.42 |  | 2981.45 ± 553.08 | | | 2863.62 ± 562.00 |  | 2917.43 ± 547.58 | 2960.21 ± 581.13 |
| t (p)-value | **6.48 (*p* < 0.01)** | |  | **4.74 (*p* < 0.01)** | | | |  | -1.66 (0.1) | |
| 50-m sprint (s) | 9.47 ± 0.81 | 9.60 ± 0.88 |  | 9.49 ± 0.85 | | | 9.60 ± 0.84 |  | 9.58 ± 0.85 | 9.45 ± 0.82 |
| t (p)-value | **-3.47 (*p* < 0.01)** | |  | **-3.08 (*p* < 0.01)** | | | |  | **3.40 (*p* < 0.01)** | |
| Standing long jump (cm) | 164.40 ± 13.41 | 167.12 ± 13.88 |  | | 165.33 ± 13.80 | 166.11 ± 13.54 | |  | 164.97 ± 13.40 | 166.94 ± 14.15 |
| t (p)-value | **-4.53 (*p* < 0.01)** | |  | | -1.28 (0.20) | | |  | **-3.08 (*p* < 0.01)** | |
| 800-m run (s) | 261.68 ± 25.49 | 258.79 ± 24.77 |  | | 260.70 ± 26.41 | 259.84 ± 23.40 | |  | 261.2 ± 24.34 | 258.73 ± 26.67 |
| t (p)-value | **2.62 (*p* < 0.01)** | |  | | 0.77 (0.44) | | |  | **2.07 (*p* < 0.05)** | |
| Seated forward bend (cm) | 14.14 ± 6.75 | 15.22 ± 6.31 |  | | 14.19 ± 6.77 | | 15.27 ± 6.23 |  | 14.79 ± 6.60 | 14.35 ± 6.50 |
| t (p)-value | **-3.75 (*p* < 0.01)** | |  | **-3.75 (*p* < 0.01)** | | | |  | 1.47 (0.14) | |
| Bent-leg-sit-ups (count) | 32.46 ± 7.20 | 30.04 ± 6.72 |  | 32.31 ± 7.25 | | | 29.99 ± 6.62 |  | 31.07 ± 6.95 | 31.85 ± 7.32 |
| t (p)-value | **7.92 (*p* < 0.01)** | |  | **7.57 (*p* < 0.01)** | | | |  | **-2.36 (*p* < 0.05)** | |
| Physical fitness score | 71.33 ± 7.91 | 70.89 ± 7.70 |  | 71.33 ± 8.16 | | | 70.85 ± 7.31 |  | 70.76 ± 7.78 | 71.81 ± 7.84 |
| t (p)-value | 1.29 (0.20) | |  | 1.37 (0.17) | | | |  | **-2.91 (*p* < 0.01)** | |
| **Male's physical fitness (*N* = 1588)** | | | | | | | | | | |
| BMI (kg/m2) | 22.45 ± 4.25 | 21.81 ± 3.76 |  | 22.46 ± 4.20 | | | 21.92 ± 3.91 |  | 22.14 ± 3.92 | 22.22 ± 4.12 |
| t (p)-value | **3.11 (*p* < 0.01)** | |  | **2.67 (*p* < 0.01)** | | | |  | -0.30 (0.77) | |
| Lung capacity (ml) | 4314.64 ± 870.41 | 4143.15 ± 839.09 |  | 4328.06 ± 892.13 | | | 4162.32 ± 820.89 |  | 4116.91 ± 887.24 | 4285.34 ± 851.59 |
| t (p)-value | **3.91 (*p* < 0.01)** | |  | **3.86 (*p* < 0.01)** | | | |  | **-3.17(*p* < 0.01)** | |
| 50-m sprint (s) | 7.66 ± 0.62 | 7.64 ± 0.63 |  | 7.65 ± 0.63 | | | 7.65 ± 0.62 |  | 7.70 ± 0.61 | 7.64 ± 0.62 |
| t (p)-value | 0.43 (0.67) | |  | 0 (1) | | | |  | 1.53 (0.13) | |
| Standing long jump (cm) | 220.36 ± 20.71 | 224.57 ± 18.81 |  | 221.06 ± 20.28 | | | 222.99 ± 19.85 |  | 219.91 ± 18.74 | 222.59 ± 20.43 |
| t (p)-value | **-4.18 (*p* < 0.01)** | |  | -1.92 (0.055) | | | |  | **-2.32 (*p* < 0.05)** | |
| 1000-m run (s) | 272.76 ± 30.29 | 266.29 ± 29.11 |  | 271.33 ± 30.96 | | | 269.09 ± 28.91 |  | 271.69 ± 28.96 | 269.83 ± 30.28 |
| t (p)-value | **4.25 (*p* < 0.01)** | |  | 1.49 (0.14) | | | |  | 1.02 (0.31) | |
| Seated forward bend (cm) | 10.18 ± 7.28 | 11.71 ± 7.54 |  | 10.11 ± 7.27 | | | 11.48 ± 7.52 |  | 10.29 ± 7.01 | 10.91 ± 7.53 |
| t (p)-value | **-3.97 (*p* < 0.01)** | |  | **-3.68 (*p* < 0.01)** | | | |  | -1.39 (0.16) | |
| Pull-ups (count) | 2.01 ± 2.74 | 3.03 ± 3.14 |  | 2.08 ± 2.73 | | | 2.75 ± 3.11 |  | 2.40 ± 2.87 | 2.41 ± 2.96 |
| t (p)-value | **-6.63 (*p* < 0.01)** | |  | **-4.55 (*p* < 0.01)** | | | |  | -0.043 (0.97) | |
| Physical fitness score | 64.12 ± 8.09 | 65.72 ± 8.10 |  | 64.40 ± 8.27 | | | 65.09 ± 7.96 |  | 63.67 ± 9.36 | 65.04 ± 8.04 |
| t (p)-value | **-3.84 (*p* < 0.01)** | |  | -1.69 (0.09) | | | |  | **-2.75 (*p* < 0.01)** | |

**Appendix 3：Correlation between empathy and physical health among college freshmen**

| Pearson | Female (*N* = 2,079) | | |  | Male (*N* = 1,588) | | |
| --- | --- | --- | --- | --- | --- | --- | --- |
| PT | PD | EC |  | PT | PD | EC |
| BMI (kg/m2) | -0.014 | 0.023 | 0.002 |  | -0.004 | 0.048 | -0.008 |
| Vital capacity (ml) | **0.056*** | -0.022 | -0.017 |  | **0.070**** | -0.01 | -0.017 |
| 50m-sprint (s) | -0.041 | 0.032 | -0.036 |  | -0.025 | 0.041 | -0.015 |
| Standing long jump (cm) | 0.026 | **-0.047*** | 0.026 |  | -0.002 | **-0.081**** | 0.018 |
| Bent-leg-sit-ups (count) | **0.068**** | -0.034 | 0.012 |  | -0.016 | -0.047 | 0.023 |
| 800m-run (s) | **-0.067**** | 0.017 | -0.033 |  |  |  |  |
| 1000m-run (s) |  |  |  |  | -0.033 | 0.040 | **-0.060**** |
| Pull/Sit-ups (count) | **0.047*** | **-0.068**** | -0.023 |  | 0.041 | **-0.059*** | 0.033 |
| Physical fitness score | **0.066**** | **-0.051*** | 0.034 |  | 0.051* | **-0.085**** | 0.018 |

**Appendix 4:** Comparison of different types of empathy with males’ physical health (Mean ± SE)

| **Constituencies** | H-LE (N = 441) | C-O (N = 330) | E-O (N = 330) | L-CE (N = 487) | *F* | *p* |
| --- | --- | --- | --- | --- | --- | --- |
| BMI(kg/m2) | 22.25 ± 0.20 | 22.03 ± 0.21 | 22.29 ± 0.24 | 22.21 ± 0.18 | 0.257 | 0.857 |
| **Lung capacity (ml)** | 4305.85 ± 41.59 | 4316.38 ± 44.93 | 4155.05 ± 48.82 | 4212.28 ± 21.34 | **2.912** | **<0.05** |
| 50-m sprint (s) | 7.66 ± 0.03 | 7.62 ± 0.03 | 7.64 ± 0.04 | 7.67 ± 0.03 | 0.342 | 0.795 |
| Standing long jump (cm) | 221.24 ± 0.93 | 223.25 ± 1.12 | 222.62 ± 1.16 | 221.39 ± 0.89 | 0.896 | 0.443 |
| Seated forward bend (cm) | 10.14 ± 0.36 | 11.41 ± 0.41 | 11.04 ± 0.40 | 10.73 ± 0.34 | 2.056 | 0.104 |
| **1000-m run (s)** | 267.42 ± 1.33 | 267.82 ± 1.68 | 272.53 ± 1.74 | 272.89 ± 1.36 | **3.946** | **<0.01** |
| Pull-ups (count) | 2.43 ± 0.15 | 2.62 ± 0.16 | 2.37 ± 0.15 | 2.25 ± 0.14 | 1.043 | 0.373 |
| **Physical fitness score** | 64.92 ± 0.38 | 65.70 ± 0.44 | 64.07 ± 0.46 | 64.38 ± 0.38 | **2.689** | **<0.05** |

Note: Error bars represent the standard error(SE); H-CE, Highly cognitive-emotional type, C-0, cognitively-oriented type, E-0, emotionally-oriented type: L-CE, low cognitive-emotional type.

**Appendix 5:** Comparison of different types of empathy with females’ physical health (Mean ± SE).

| **Constituencies** | **H-LE (N = 573)** | **C-O (N = 400)** | **E-O (N = 413)** | **L-CE (N = 693)** | ***F*** | ***p*** |
| --- | --- | --- | --- | --- | --- | --- |
| BMI(kg/m2) | 20.73 ± 0.12 | 20.52 ± 0.14 | 20.99 ± 0.16 | 20.71 ± 0.07 | 1.925 | 0.123 |
| lung capacity (ml) | 2971.71 ± 24.86 | 2957.57 ± 29.35 | 2884.60 ± 26.21 | 2913.59 ± 20.01 | 2.482 | 0.059 |
| 50-m sprint (s) | 9.52 ± 0.04 | 9.46 ± 0.04 | 9.55 ± 0.04 | 9.57 ± 0.03 | 1.886 | 0.130 |
| Standing long jump (cm) | 165.62 ± 0.59 | 166.38 ± 0.69 | 165.02 ± 0.66 | 165.65 ± 0.51 | 0.669 | 0.571 |
| **Seated forward bend (cm)** | 14.56 ± 0.27 | 15.70 ± 0.32 | 14.19 ± 0.33 | 14.36 ± 0.25 | **4.621** | **<0.01** |
| **800-m run (s)** | 260.69 ± 1.08 | 257.47 ± 1.29 | 259.32 ± 1.15 | 262.32 ± 0.96 | **3.427** | **<0.05** |
| **Bent-leg-sit-up (count)** | 31.19 ± 0.30 | 32.48 ± 0.40 | 30.92 ± 0.33 | 31.06 ± 0.25 | **4.353** | **<0.01** |
| **physical fitness score** | 71.16 ± 0.34 | 72.42 ± 0.39 | 70.72 ± 0.38 | 70.60 ± 0.29 | **5.132** | **<0.01** |

Note: Error bars represent the standard error(SE); H-CE, Highly cognitive-emotional type, C-0, cognitively-oriented type, E-0, emotionally-oriented type: L-CE, low cognitive-emotional type.
